# Supplementary material for: Renal Effects of Fetal Reprogramming With Pentaerythritol Tetranitrate in Spontaneously Hypertensive Rats
Source: PubMed Central journal article supplement (PMC7201020; doi:10.3389/fphar.2020.00454), 2020-04-29
Supplement: DataSheet_1.pdf [file DataSheet_1.pdf]

## **Renal effects of fetal reprogramming with pentaerythritol tetranitrate in spontaneously hypertensive rats**

Andy W C Man<sup>1†</sup>, Min Chen<sup>1,2†</sup>, Zhixiong Wu<sup>1</sup>, Gisela Reifenberg<sup>1</sup>, Andreas Daiber<sup>3,4</sup>, Thomas Münzel<sup>3,4</sup>, Ning Xia<sup>1</sup>, Huige Li<sup>1\*</sup>

<sup>1</sup> Department of Pharmacology, Johannes Gutenberg University Medical Center, 55131 Mainz, Germany; <sup>2</sup> Department of Anaesthesiology, Institute of Anaesthesiology and Critical Care Medicine, Union Hospital, Tongji Medical College, Huazhong University of Science and Technology, Wuhan, China. <sup>3</sup> Center for Cardiology, Cardiology I - Laboratory of Molecular Cardiology, Johannes Gutenberg, University Medical Center, Mainz, Germany; <sup>4</sup> German Center for Cardiovascular Research (DZHK), Partner Site Rhine-Main, Mainz, Germany.

Correspondence:

Dr. Ning Xia or Prof. Dr. Huige Li, Department of Pharmacology, Johannes Gutenberg University Medical Center, Obere Zahlbacher Str. 67, 55131 Mainz, Germany. E-Mail: xianing@uni-mainz.de (N.X.); huigeli@uni-mainz.de (H.L.)

† These authors contributed equally to this work and should be both considered as first author.

Running title: fetal reprogramming in kidney

Original article

Key words: fetal programming; epigenetics; spontaneously hypertensive rats; pentaerythritol tetranitrate; kidney fibrosis

**Supplementary Files**

## Supplementary Tables.

Supplementary Table 1. Primer list for gene expression studies using qPCR

|                  |                          |
|------------------|--------------------------|
| ACE -F           | CAGAGGCCAACTGGCATTAT     |
| ACE -R           | CTGGAAGTTGCTCACGTCAA     |
| FGF2 -F          | TCCATCAAGGGAGTGTGTGC     |
| FGF2 -R          | TCCGTGACCGGTAAGTGTTG     |
| NHE3 -F          | AACTCTCCAGCAACTTCCG      |
| NHE3 -R          | GCCTGTATCATGTGTGTGGA     |
| TNF $\alpha$ -F  | ATGGGCTCCCTCTCATCAGT     |
| TNF $\alpha$ -R  | GCTTGGTGGTTTGCTACGAC     |
| Wnt4 -F          | AGGTGGTGACACAAGGGACC     |
| Wnt4 -R          | CCATAGGCGATGTTGTCCGA     |
| MMP2 -F          | CAAGCCCAAGTGGGACAAGA     |
| MMP2 -R          | CCATGCTCCCATCGACCAA      |
| MMP9 -F          | AGCCGACGTCCTGTAAGT       |
| MMP9 -R          | AACAGGCTGTACCCTTGGTC     |
| TGF $\beta$ -F   | CTGCTGACCCCACTGATAC      |
| TGF $\beta$ -R   | AGCCCTGTATTCCGTCTCCT     |
| Nr3c2 -F         | AATAACGTCCCTCTGCGCTC     |
| Nr3c2 -R         | GCCTGAAGTGGCATAGCTGA     |
| Rac1 -F          | CAATGCGTTCCTGGAGAGT      |
| Rac1 -R          | AACACGTCTGTTTGCGGGTA     |
| Sgk1 -F          | TAGCCTCACCATCCCGTTTG     |
| Sgk1 -R          | CATCTGCGTACCCGCTTCTT     |
| CD74 -F          | TCCCTGGACACAACAATGA      |
| CD74 -R          | AAATGGGGGTCCCTTAGATG     |
| CD45 -F          | AGGAAACTTGCTCCCCATCC     |
| CD45 -R          | TGTTCCCTTGCCCTGTGACAA    |
| CD11b -F         | GGCCTGTACAAGCTTGGCTTT    |
| CD11b -R         | GCTGTTGGTCTGACCGTCTA     |
| CD3e -F          | AGTAATGAGCCAGCCGTGTC     |
| CD3e -R          | AGACTTCATACTTTCCTGGCA    |
| CD19 -F          | CACCCATGGTTCATTGCCCA     |
| CD19 -R          | GCACAACATTGTCTCCCTCTTC   |
| ICAM -F          | CGGGAGATGAATGGTACCTACAA  |
| ICAM -R          | TGCACGTCCCTGGTGATACTC    |
| VCAM -F          | GAAGCCGGTCATGGTCAAGT     |
| VCAM -R          | GGTACCCTTGAACAGTTCTATCTC |
| NF $\kappa$ B1-F | GCTTACGGTGGGATTGCATT     |
| NF $\kappa$ B1-R | TTATGGTGCCATGGGTGATG     |
| Pol II-F         | AACGAACTGCCCGGCTTAC      |
| Pol II-R         | CCCTTCAACCGTTGCTTCAC     |

Supplementary Table 2. Primer list for chromatin accessibility and CHIP-qPCR studies

| Primer  | Primer sequence       | Target Gene ID |
|---------|-----------------------|----------------|
| FGF2 -F | GCGGTTTTTCATCTTCCCACG | 54250          |
| FGF2 -R | GAGACAGAGGCCAGGAATGG  |                |
| NHE3 -F | GGTGGCCTTTAATCCCGCTG  | 24784          |
| NHE3 -R | ACTGTTTGCATTACGTGCG   |                |
| ACE -F  | TTTATAATCCGCAGGGCGGT  | 24310          |
| ACE -R  | CCCATGGCGCGGTGC       |                |
